# Supplementary material for: Organosilane micellization for direct encapsulation of hydrophobic quantum dots into silica beads with highly preserved fluorescence
Source: Royal Society of Chemistry journal article supplement (doi:10.1039/c2cc32084c), 2012-01-01
Supplement: c2cc32084c.pdf [file c2cc32084c.pdf]

## Supplementary Information

### Organosilane micellization for direct encapsulation of hydrophobic quantum dots into silica beads with highly preserved fluorescence

Liang Huang, Zhihui Luo and Heyou Han\*

*State Key Laboratory of Agricultural Microbiology, College of Science, Huazhong Agricultural University, Wuhan 430070, China. Fax: +86-27-87288246; Tel.: +86-27-87288246; E-mail: hyhan@mail.hzau.edu.cn*

#### Experimental section

##### Reagents

Trioctylphosphine oxide (TOPO, 90%), hexadecylamine (HDA, 90%), trioctylphosphine (TOP, 90%), dioctylamine (DOA, 90%), 1-octadecene (ODE, 90%), stearic acid (SA, 95%), cadmium oxide (CdO, 99.99%), selenium powder (99.99%), zinc diethyldithiocarbamate (ZDC, 98%), sodium silicate solution (27 wt % SiO<sub>2</sub>), tetraethyl orthosilicate (TEOS, 99%) and mercaptopropionic acid (MPA, 99%) were purchased from Aldrich. N-octyl triethoxy silane (OTES, 98%) was purchased from TCI. Chloroform, methanol, ethanol, and aqueous ammonia solution (28%) were supplied by Sinopharm Chemical Reagent Co., Ltd. Ultrapure water with a conductivity of 18.25 MΩ.cm was used throughout the experiments.

##### Preparation of CdSe/ZnS QDs

HDA and TOPO capped CdSe QDs were synthesized according to previous method<sup>1</sup> with slight modification. Typically, the cadmium precursor was prepared by heating a mixture of 0.1 mmol CdO and 0.4 mmol SA at 150 °C in a three-neck flask under Ar flow until a colorless clear solution was obtained. The flask was cooled to room temperature and 1.94 g of both HDA and

TOPO were added. The mixture was then heated to 320 °C under Ar flow and the selenium precursor (1 mmol selenium powder dissolved in 1 mL TOP and 2 mL DOA in glove box) was swiftly injected into the flask. The solution was kept at 260 °C for the nanocrystal growth until reached the required emission. The growth of ZnS shell was achieved by the reported single precursor route.<sup>2</sup> In this case, 74 mg of ZDC was dissolved in 1 mL TOP and 2.6 mL ODE. When the QDs solution was cooled to 160 °C under Ar flow, 0.9 mL of ZDC precursor was added with a syringe and the solution was kept at this temperature for 30 min. 1.2 mL and 1.5 mL of ZDC precursor were injected for the second and third round of shell growth with the same reaction parameters. The QDs were washed with chloroform/methanol (1:1) mixture for three times and finally dispersed in 10 mL chloroform as the stock solution. Water solubilization of CdSe/ZnS QDs by MPA coating was performed using the previous method.<sup>3</sup>

#### **Preparation of silica beads embedding CdSe/ZnS QDs**

The procedure to prepare the typical 25 nm silica beads with CdSe/ZnS QDs is as follows: 750 µL of QD stock solution ( $2.1 \times 10^{-5}$  mol L<sup>-1</sup>) was mixed with equal volume of methanol to precipitate the QDs. The QDs were collected by centrifugation, dried under air flow and dissolved by 40 µL OTES to obtain an optically clear solution. The organosilane was transferred to the bottom of a glass vessel and then 40 mL water and 60 µL aqueous ammonia solution (28%) was added. The mixture was processed by a tapered microtip sonicator (VCX800 Ultrasonic processor, Sonics) with 6 mm diameter probe and 30% amplitude. The working circle consisted of 5 s sonicating and 3 s pausing over a period of one hour. The temperature of the solution would rise upto 65 °C during the processing. The resulting solution was passed through a 0.22 µm pore size filter to remove any existing cloudiness. Then 1.6 mL of sodium silicate solution (0.54 wt %) was added

to the transparent filtrate which was subsequently stirred for 72 h. To prepare the 16 nm and 38 nm silica beads, 400  $\mu$ L and 1.2 mL of QD stock solution were used, respectively.

### **Extensive silica growth on the nanobeads**

The crude solution of silica beads (25 nm) were concentrated by ultrafiltration using a 30 kDa-MWCO filter to reach an optical density of 0.1 at 566 nm (exciton absorption peak of QDs). Then 3 mL of above solution was added to a mixture of 9 mL ethanol, 0.2 mL ammonia and 12  $\mu$ L TEOS. The mixture was gently stirred for 6 h at room temperature to deposit a 15 nm silica shell on the nanobeads.

### **Characterization**

Transmission electron microscopy (TEM) image and energy- dispersive X-ray spectroscopy (EDX) were acquired on JEM-2010FEF transmission electron microscope with an EDAX attachment operating at an accelerating voltage of 200 kV. Dynamic light scattering was measured on Malvern Zetasizer Nanoseries using 633 nm laser at 25 °C. Aliquots of the reaction mixture were run over a 0.22  $\mu$ m pore size filter before any size measurement. Ultraviolet-Visible (UV-Vis) absorption spectra were recorded on Nicolet Evolution 300 Ultraviolet-Visible spectrometer. Photoluminescence (PL) spectra and PL decay curves were measured on Edinburgh FLS920 spectrometer ( $\lambda_{\text{ex}}$ =390 nm,  $\lambda_{\text{em}}$ =580 nm). PL stability was tested on Perkin Elmer LS-55 spectrometer in time drive mode ( $\lambda_{\text{ex}}$ =390 nm,  $\lambda_{\text{em}}$ =580 nm). The photoluminescence quantum yield (PL QY) of CdSe/ZnS QDs before and after silica coating were calculated with the described procedure<sup>1</sup>, using Rhodamine 6G in ethanol as a standard (PL QY = 95%).

## References

- 1 L. H. Qu and X. G. Peng, *J. Am. Chem. Soc.*, 2002, **124**, 2049.
- 2 W. J. Zhang, G. J. Chen, J. Wang, B. C. Ye and X. H. Zhong, *Inorg. Chem.*, 2009, **48**, 9723.
- 3 J. H. Gao, K. Chen, R. G. Xie, J. Xie, S. Lee, Z. Cheng, X. G. Peng, and X. Y. Chen, *Small.*, 2010, **6**, 256.

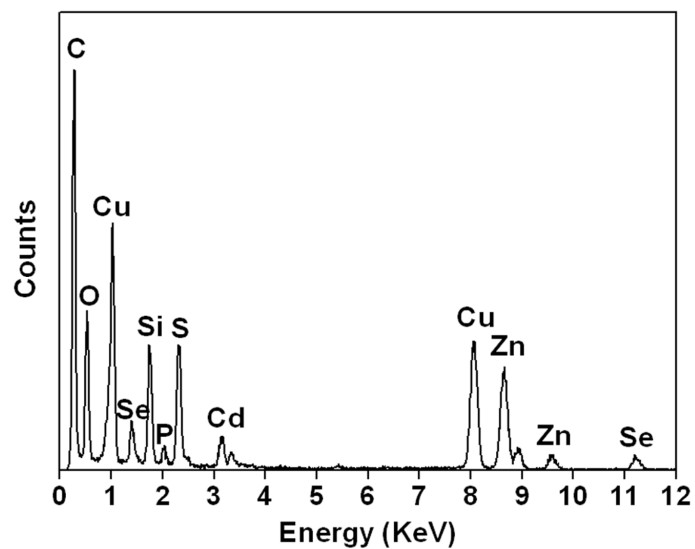

**Fig. S1** EDX analysis of CdSe/ZnS QDs incorporated silica beads.

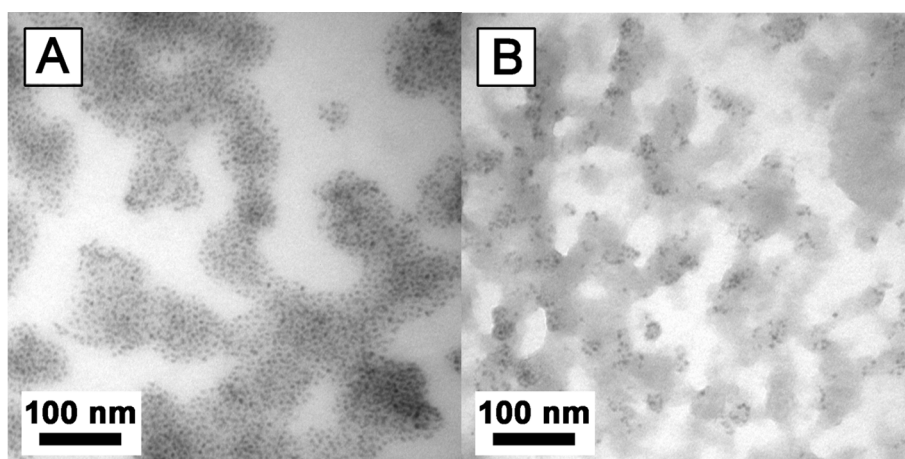

**Fig. S2** TEM images of silane-QDs micelles with starting QD concentrations (in OTES) of  $1.1 \times 10^{-3} \text{ mol L}^{-1}$  (A) and  $4 \times 10^{-5} \text{ mol L}^{-1}$  (B).

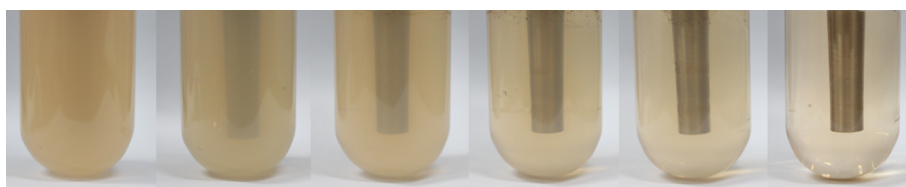

**Fig. S3** Appearance of the oil in water microemulsion (left to right) with ultrasonication time of 5 min, 10 min, 20 min, 30 min, 40 min and after filtration.

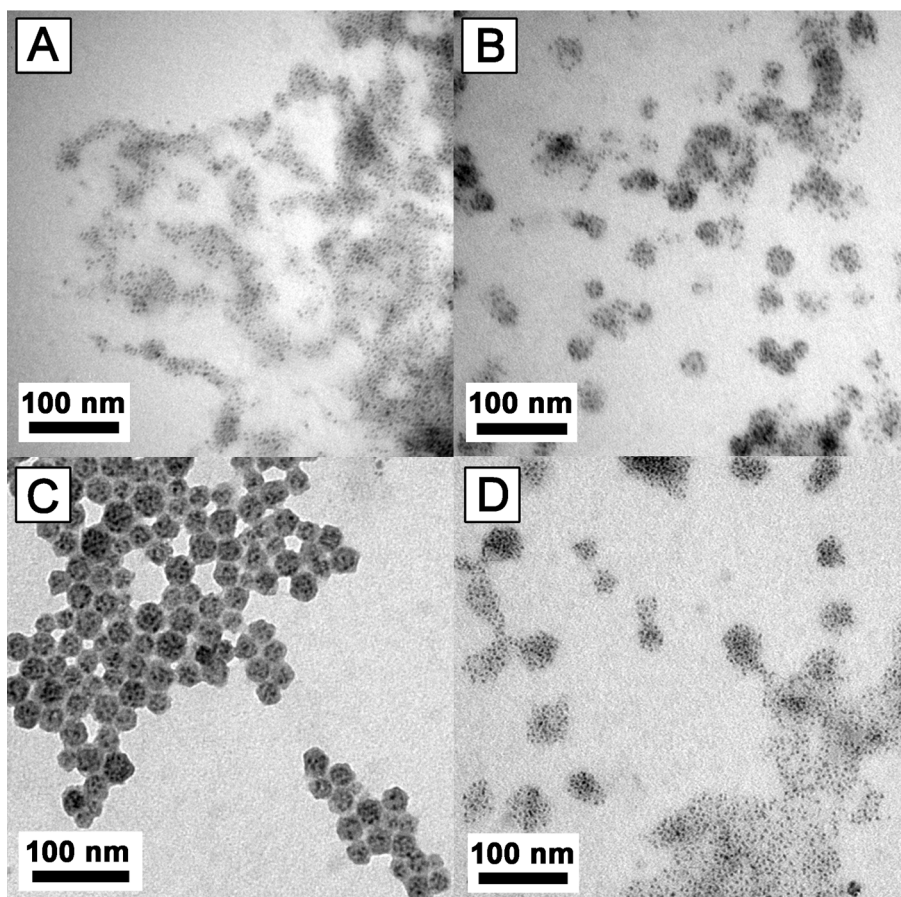

**Fig. S4** TEM images of silane-QDs micelles after silicate deposition for 0 h (A), 24h (B), 72h (C) and controlled micelles after 72 h stirring without silicate deposition (D).

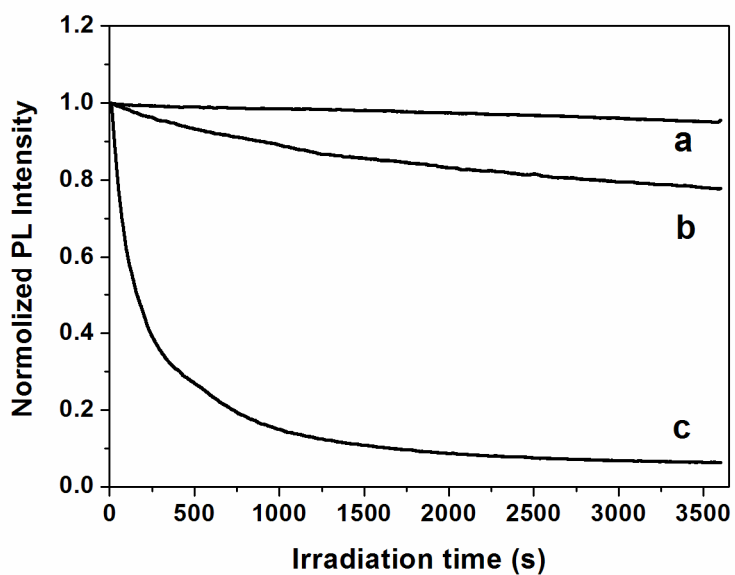

**Fig. S5** PL intensity changes of QDs incorporated silica beads (a), silane micelles (b) and MPA coated QDs (c) within 3600 s excitation.

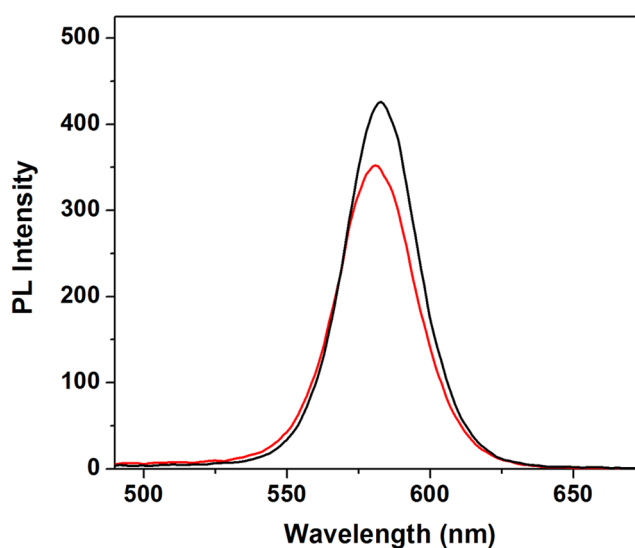

**Fig. S6** PL spectra of QDs/SiO<sub>2</sub> nanobeads before (black) and after (red) extensive silica coating for 6 h in ethanol/water mixture.

**Table S1** Decay times, amplitudes of the components and mean lifetimes from CdSe/ZnS QDs at different synthetic stages

| Sample | $\tau_1$ (ns) | $B_1$ (%) | $\tau_2$ (ns) | $B_2$ (%) | $\tau$ (ns) |
|--------|---------------|-----------|---------------|-----------|-------------|
| 1      | 5.52          | 59.43     | 21.12         | 40.57     | 16.80       |
| 2      | 6.56          | 55.01     | 22.46         | 44.99     | 18.28       |
| 3      | 8.16          | 50.10     | 27.15         | 49.90     | 22.75       |
| 4      | 10.78         | 49.17     | 27.93         | 50.83     | 23.27       |
| 5      | 12.00         | 39.52     | 23.67         | 60.48     | 20.77       |

Sample 1-5 represent the CdSe/ZnS QDs when ultrasonicated for 40 min, deposited with silicate for 24 h, 48 h, 72 h and before encapsulation (in chloroform), respectively. The biexponential fitting of PL decay curve can be described by:  $F(t) = A + B_1 \exp(-t/\tau_1) + B_2 \exp(-t/\tau_2)$ , where  $\tau_1$  and  $\tau_2$  represent the decay times and  $B_1$  and  $B_2$  stand for amplitudes of the fast and slow components, respectively. The mean lifetime ( $\tau$ ) can be calculated by:  $\tau = (B_1\tau_1^2 + B_2\tau_2^2)/(B_1\tau_1 + B_2\tau_2)$ .
